# Supplementary material for: Vitamin D in Acute Campylobacteriosis–Results From an Intervention Study Applying a Clinical Campylobacter jejuni Induced Enterocolitis Model
Source: PubMed Central journal article supplement (PMC6735268; doi:10.3389/fimmu.2019.02094), 2019-09-03
Supplement: Image_4.pdf [file Image_4.pdf]

# A Apoptotic Cells - COLON

None

Placebo

Vitamin D

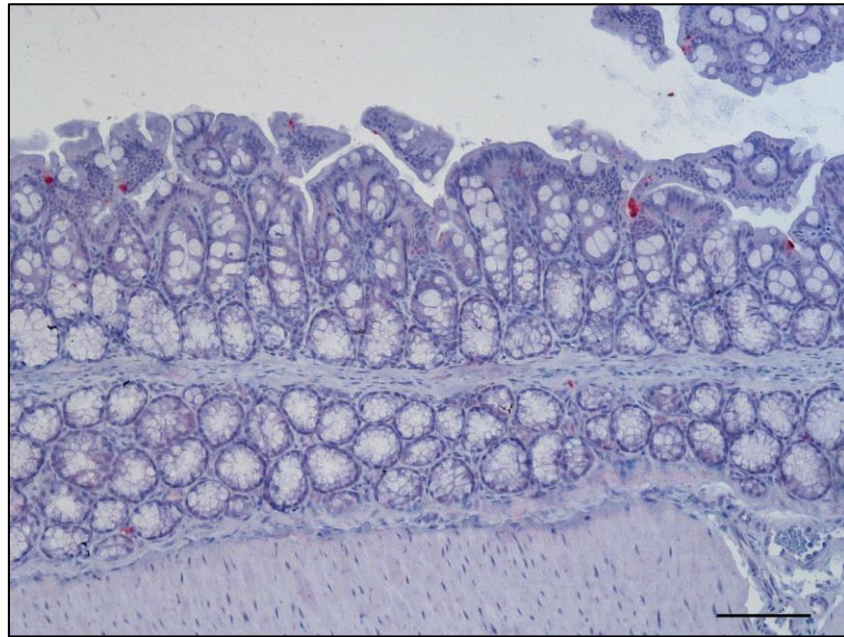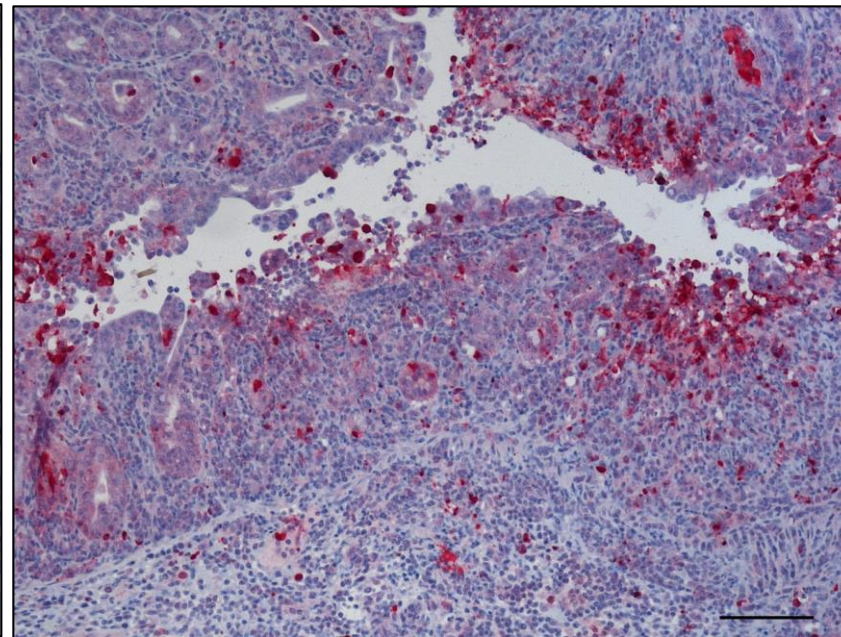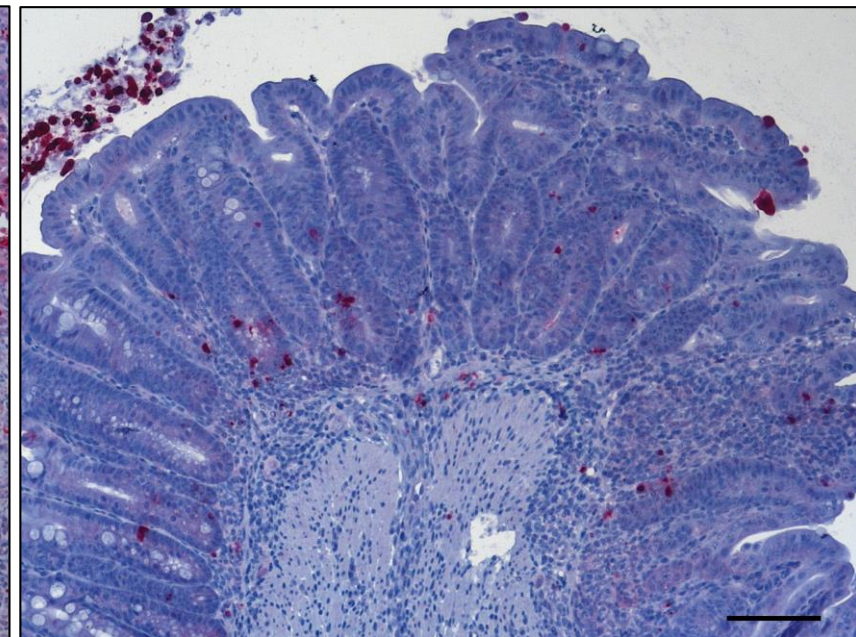

(100 x magnification, scale bar 100  $\mu$ m)

# **B Proliferating Cells - COLON**

**None**

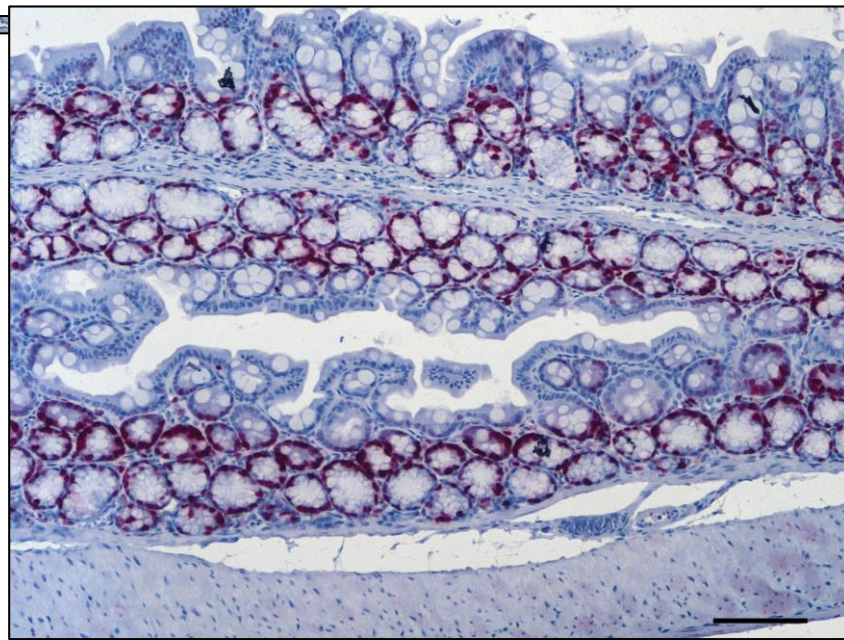

**Placebo**

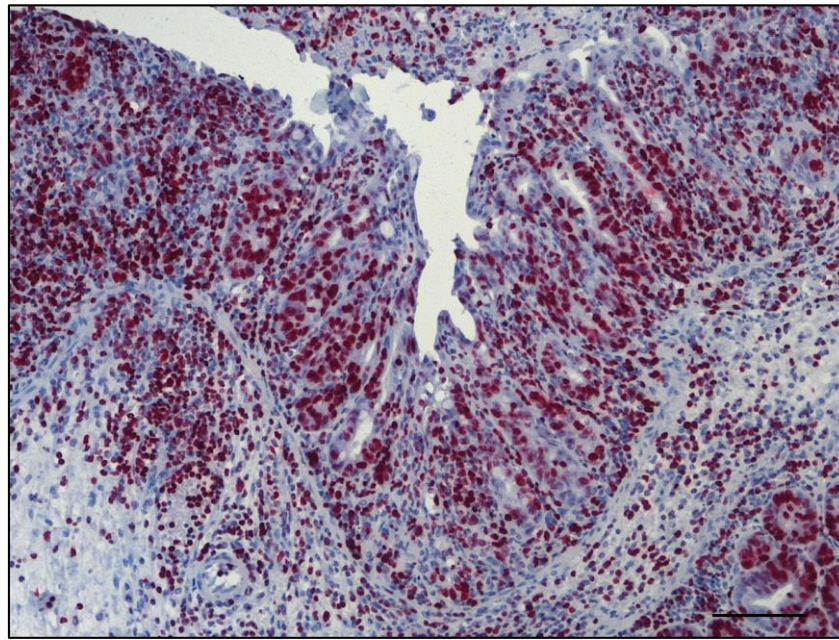

**Vitamin D**

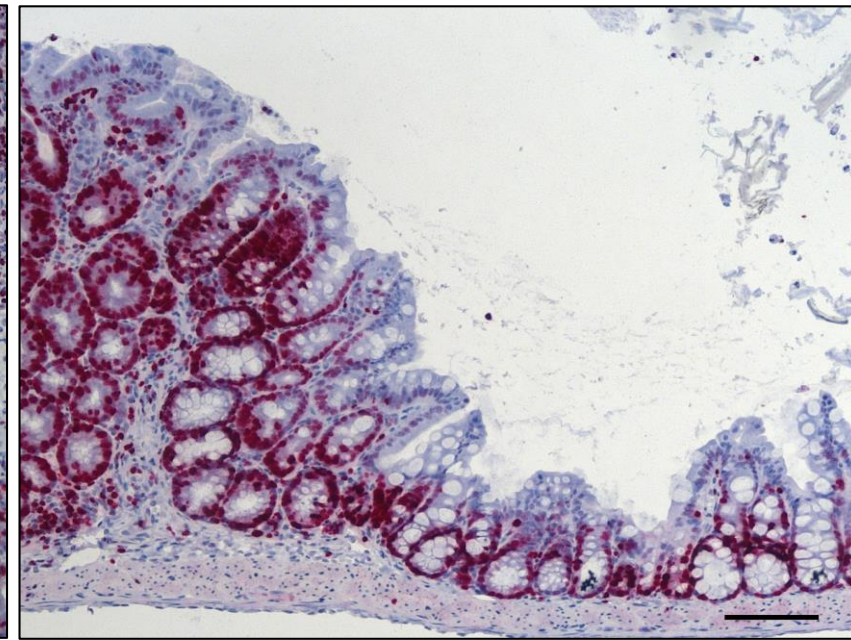

**(100 x magnification, scale bar 100  $\mu$ m)**

# C Macrophages / Monocytes - COLON

None

Placebo

Vitamin D

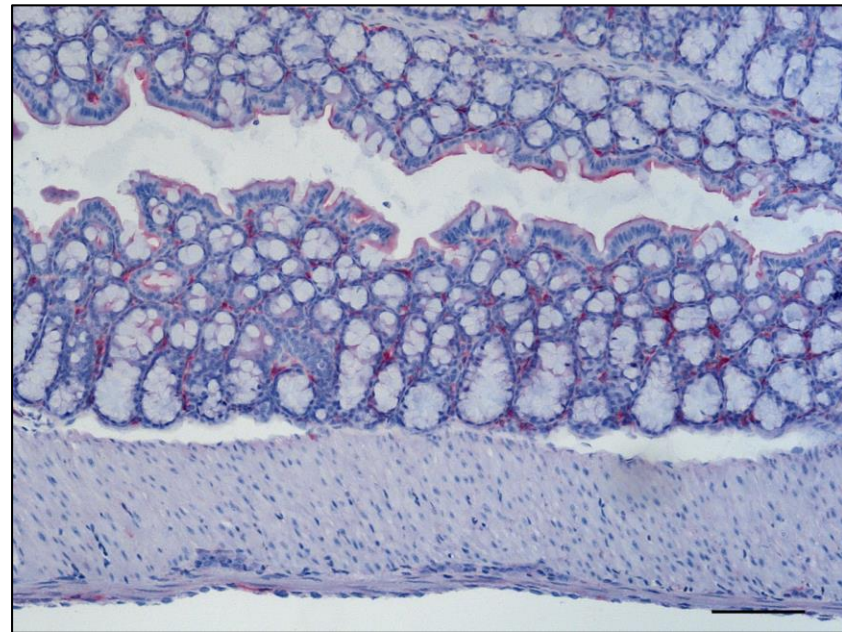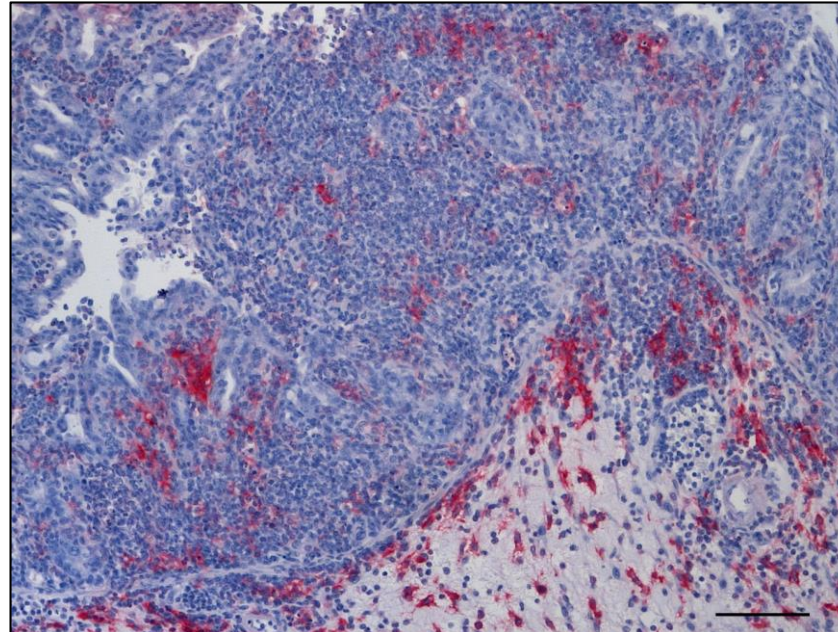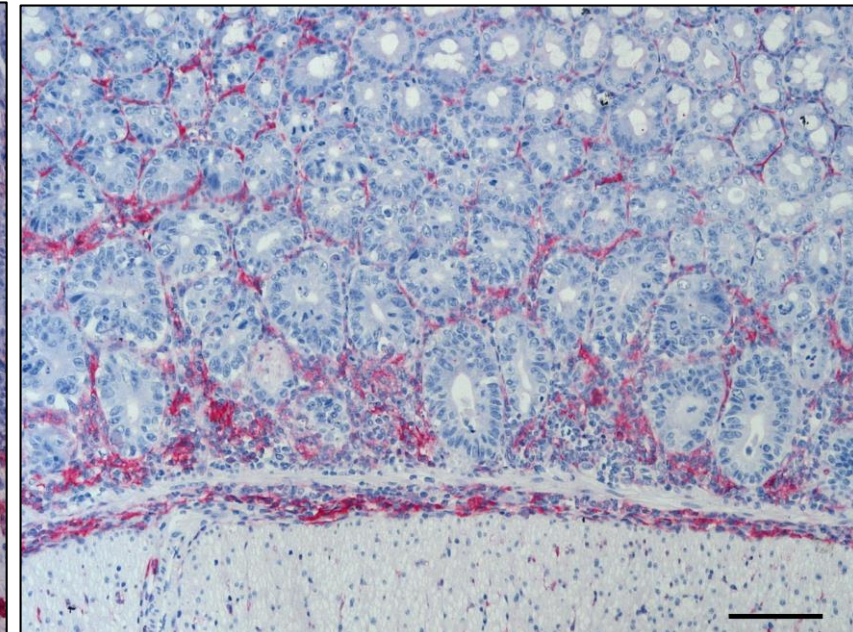

(100 x magnification, scale bar 100  $\mu$ m)

# D T Lymphocytes - COLON

None

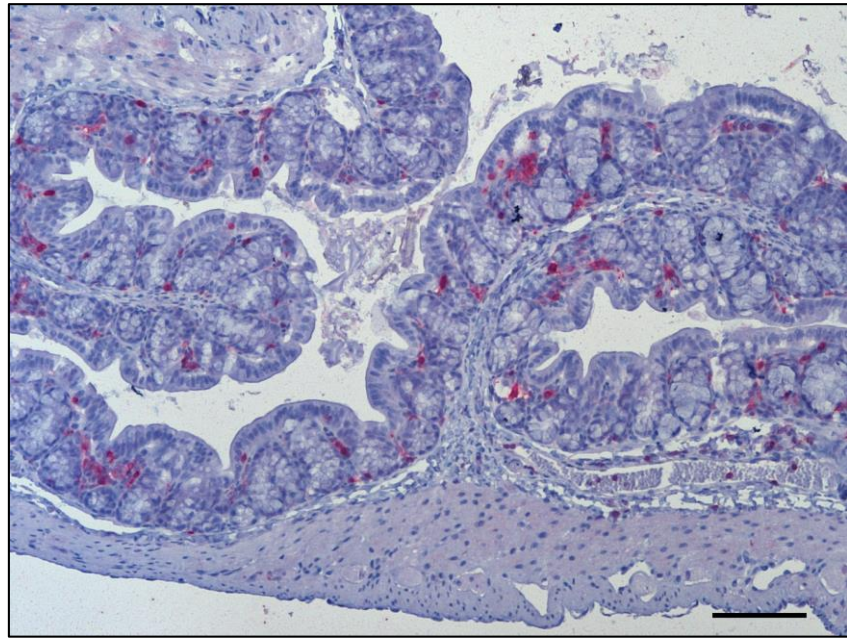

Placebo

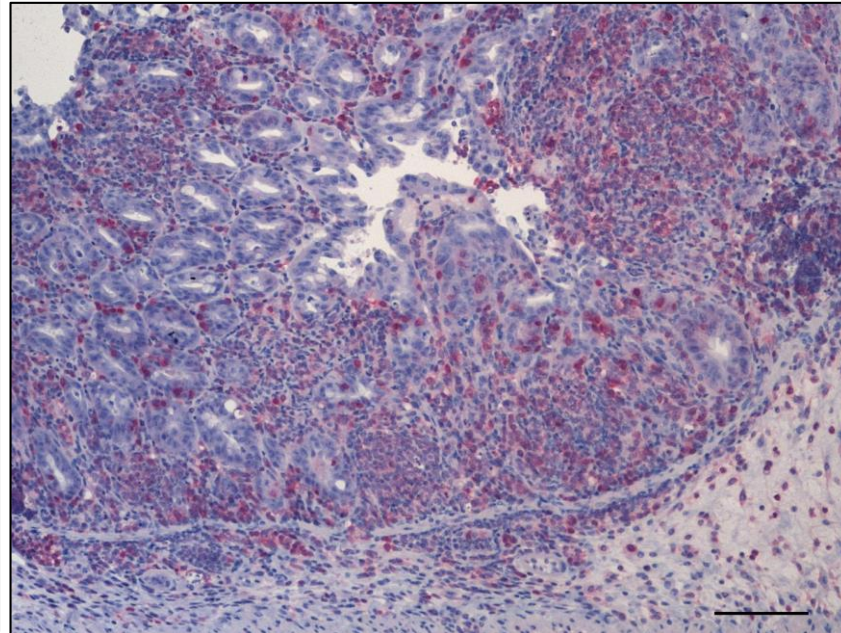

Vitamin D

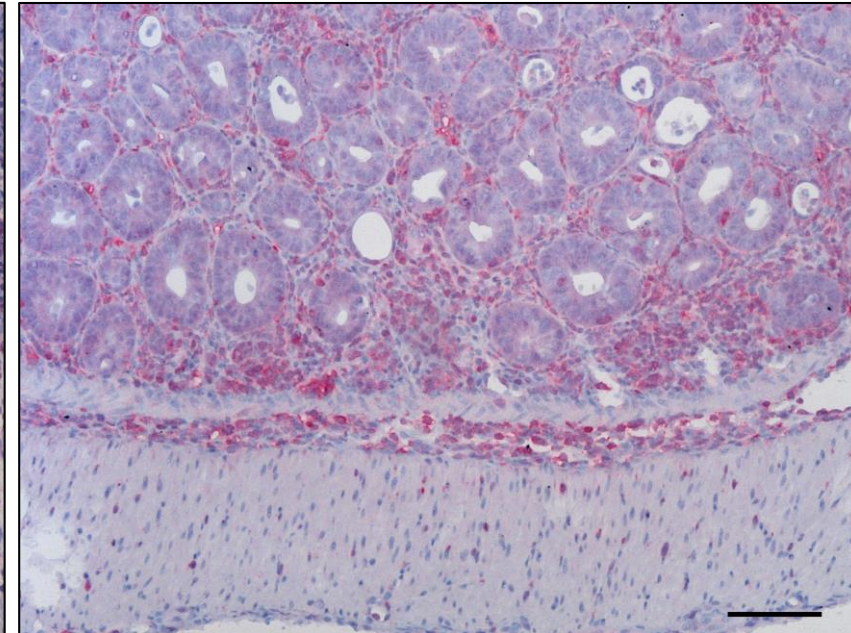

(100 x magnification, scale bar 100  $\mu$ m)

# E Regulatory T Cells - COLON

**None**

**Placebo**

**Vitamin D**

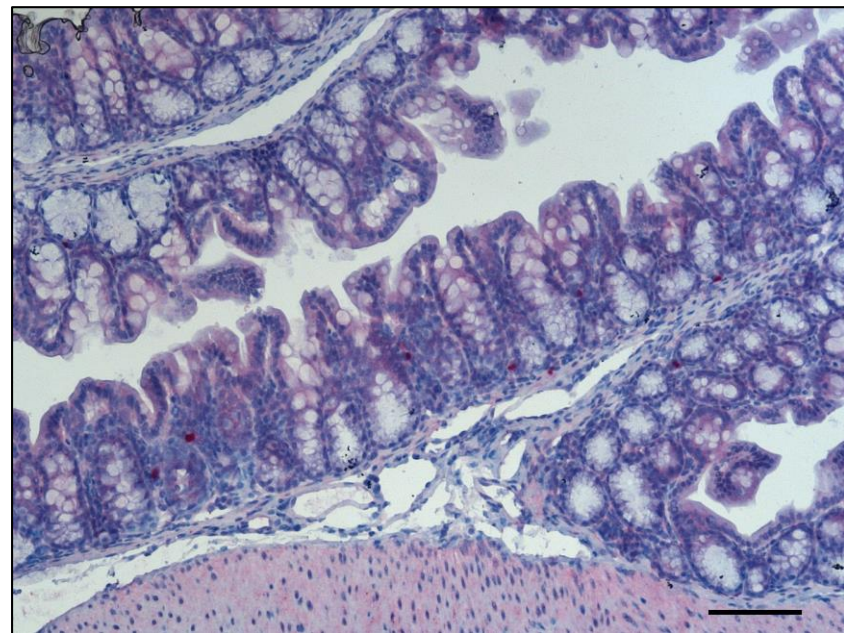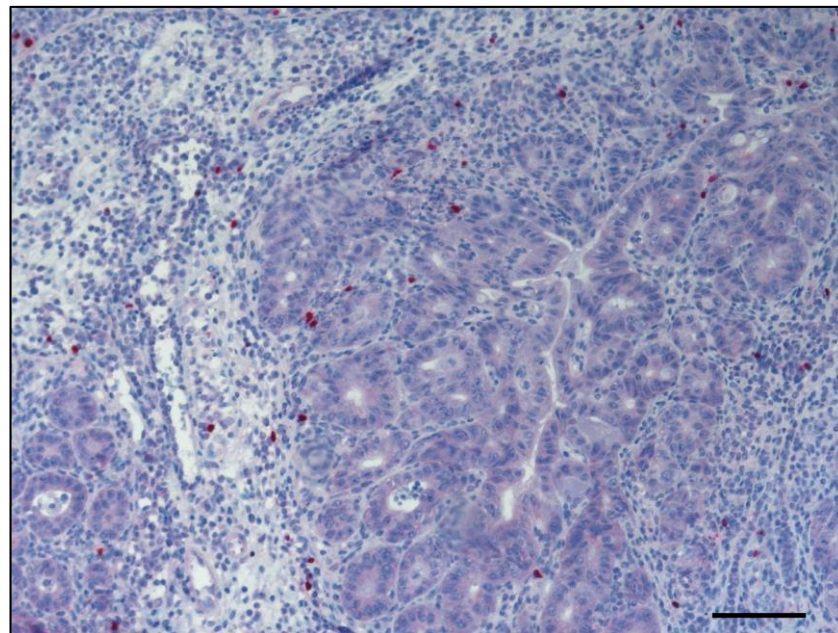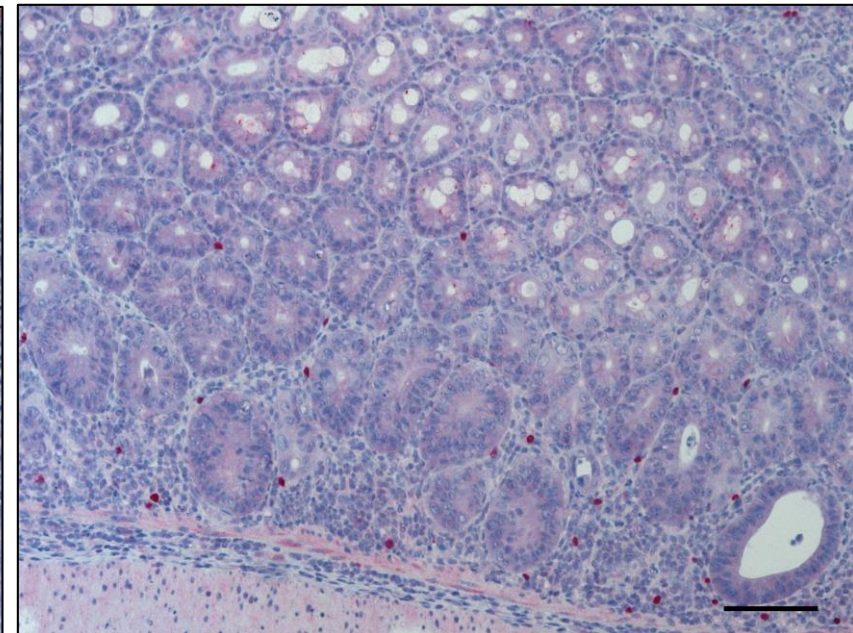

**(100 x magnification, scale bar 100  $\mu$ m)**
